# Supplementary material
Source: Springer Nature journal article supplement (https://www.springermedizin.de/resource/supplementary/12913_2013_2923_MOESM2_ESM.pdf/9531882)

**Budget  
impact  
(€)**

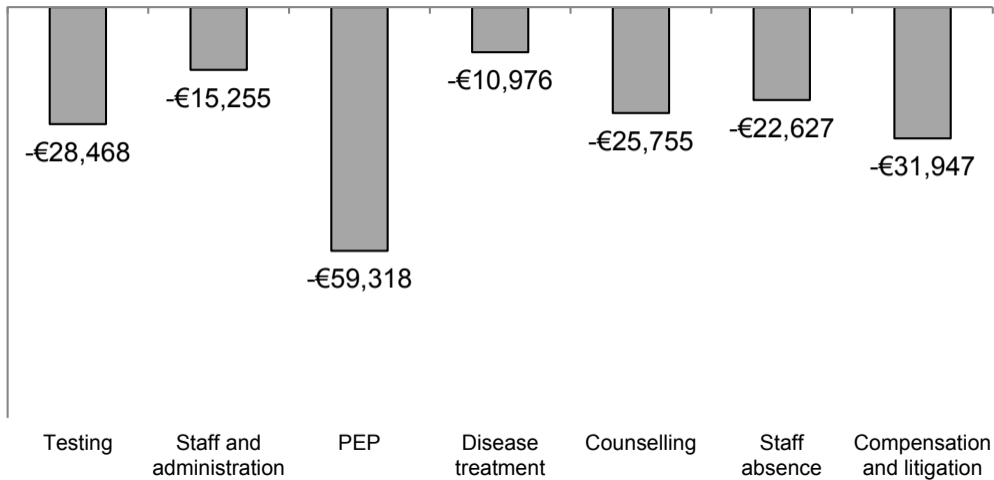

Supplement: MOESM2 [file 9531882]
